# Supplementary material for: Comparative transcriptomics of early petal development across four diverse species of Aquilegia reveal few genes consistently associated with nectar spur development
Source: PubMed Central journal article supplement (PMC6704642; doi:10.1186/s12864-019-6002-9), 2019-08-22
Supplement: 12864_2019_6002_MOESM1_ESM.pdf [file 12864_2019_6002_MOESM1_ESM.pdf]

*MONOPTEROS/AUXIN RESPONSE FACTOR 5*

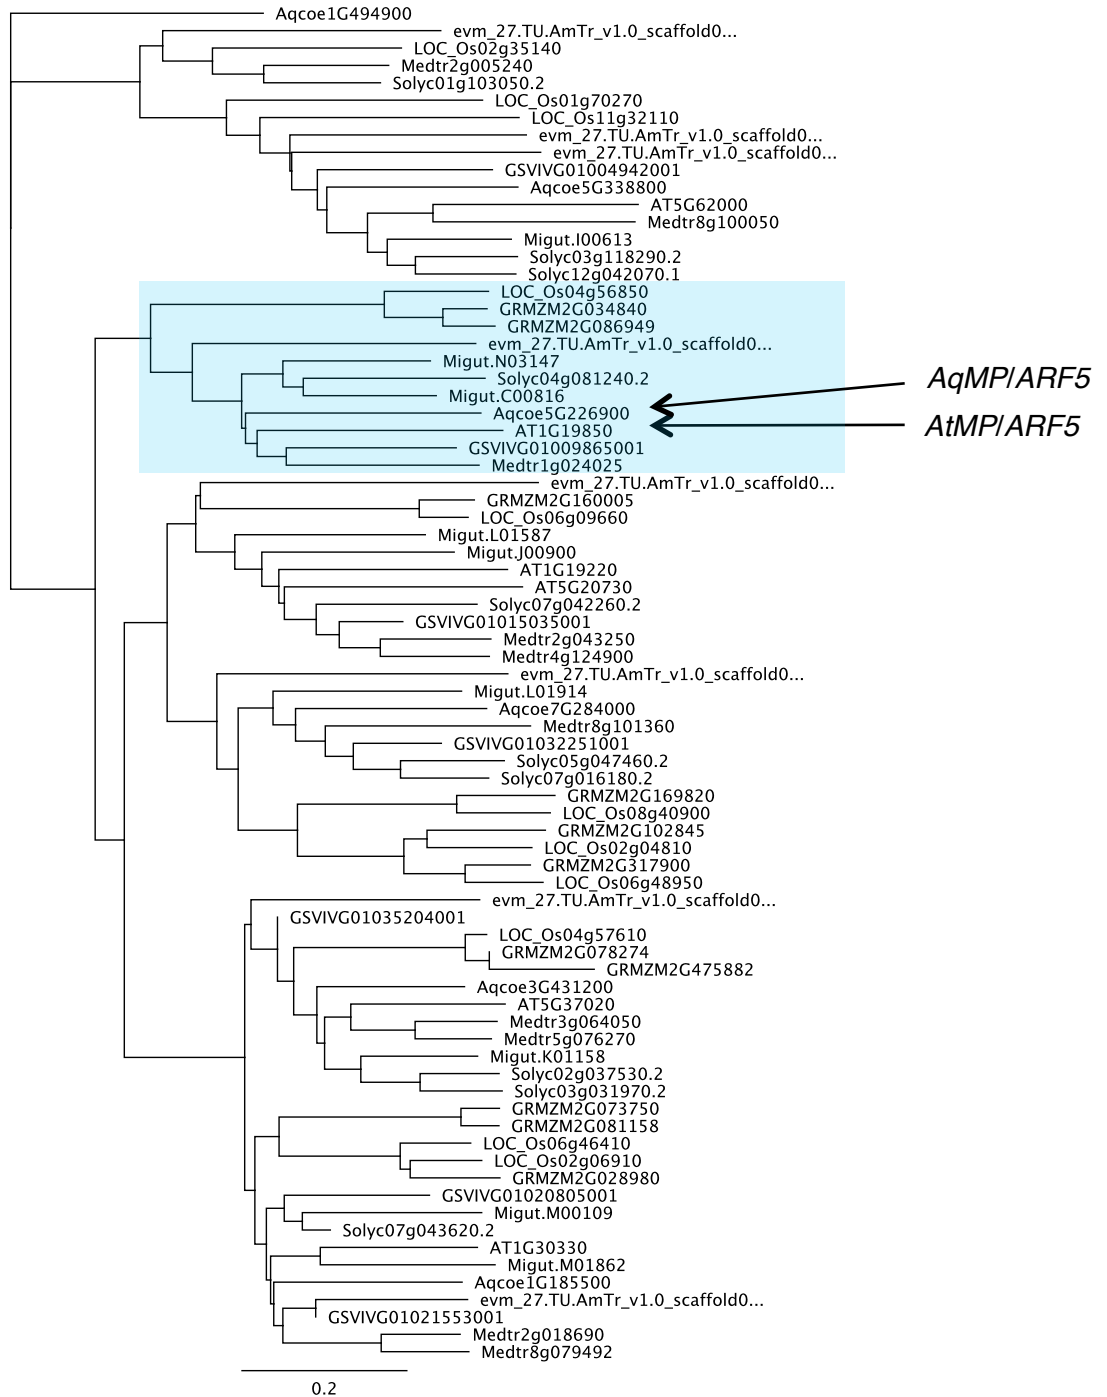

*AINTEGUMENTA* and *AINTEGUMENTA*-LIKE GENES

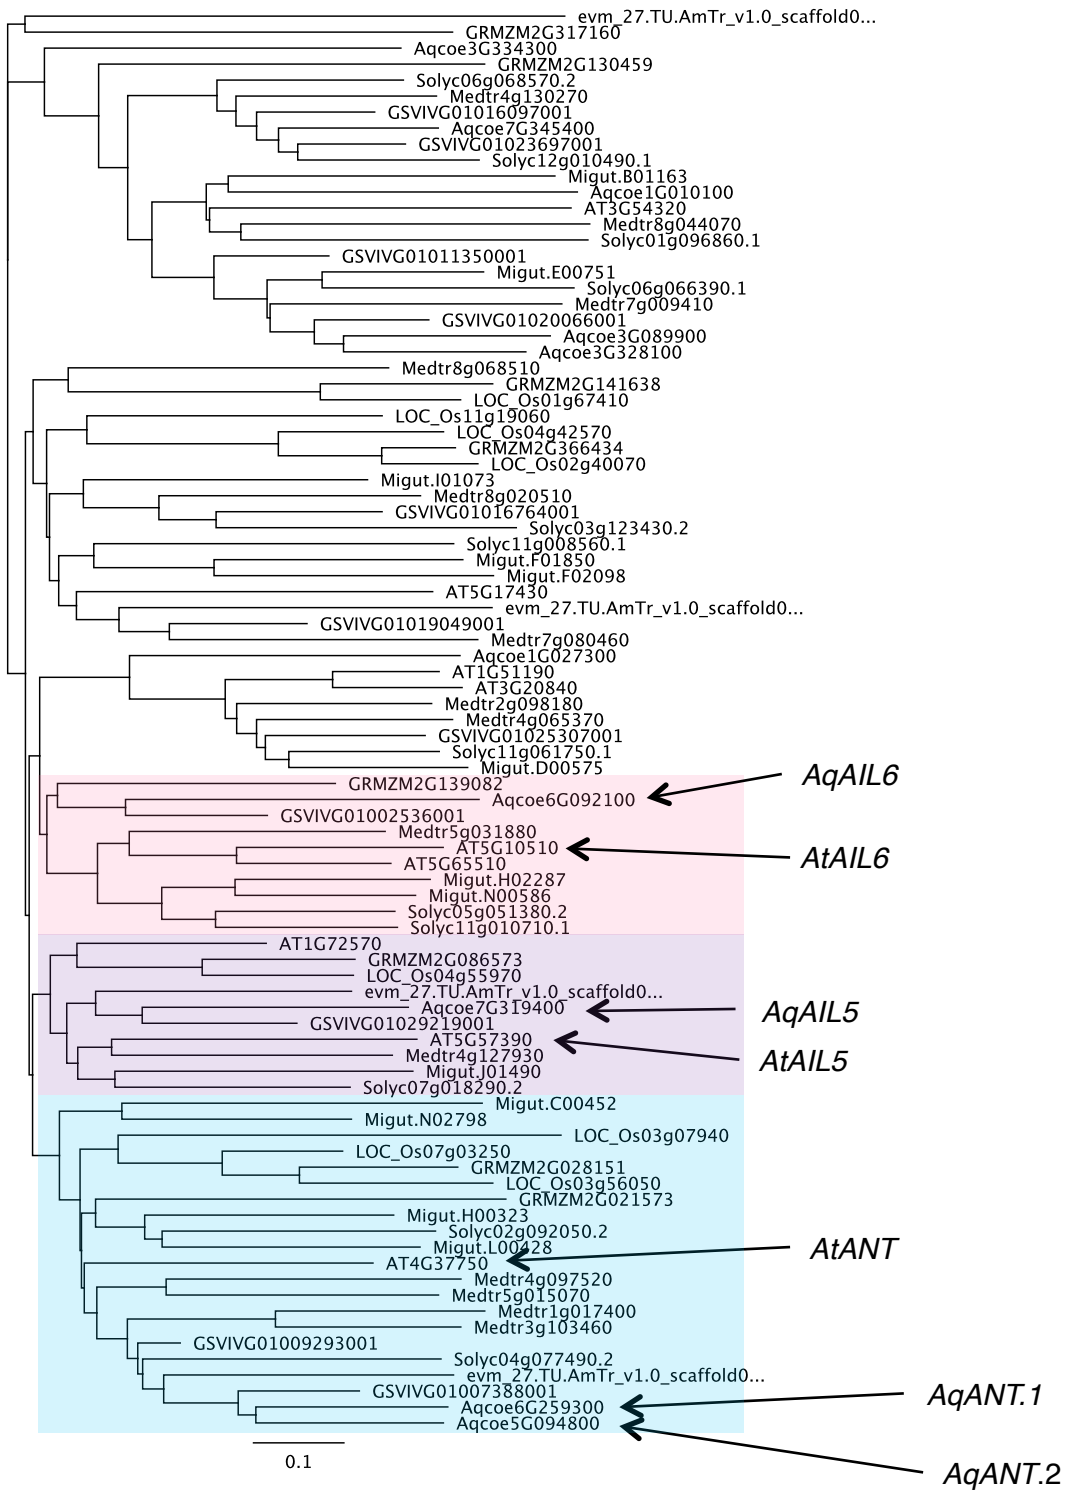

GROWTH REGULATING FACTOR GENES

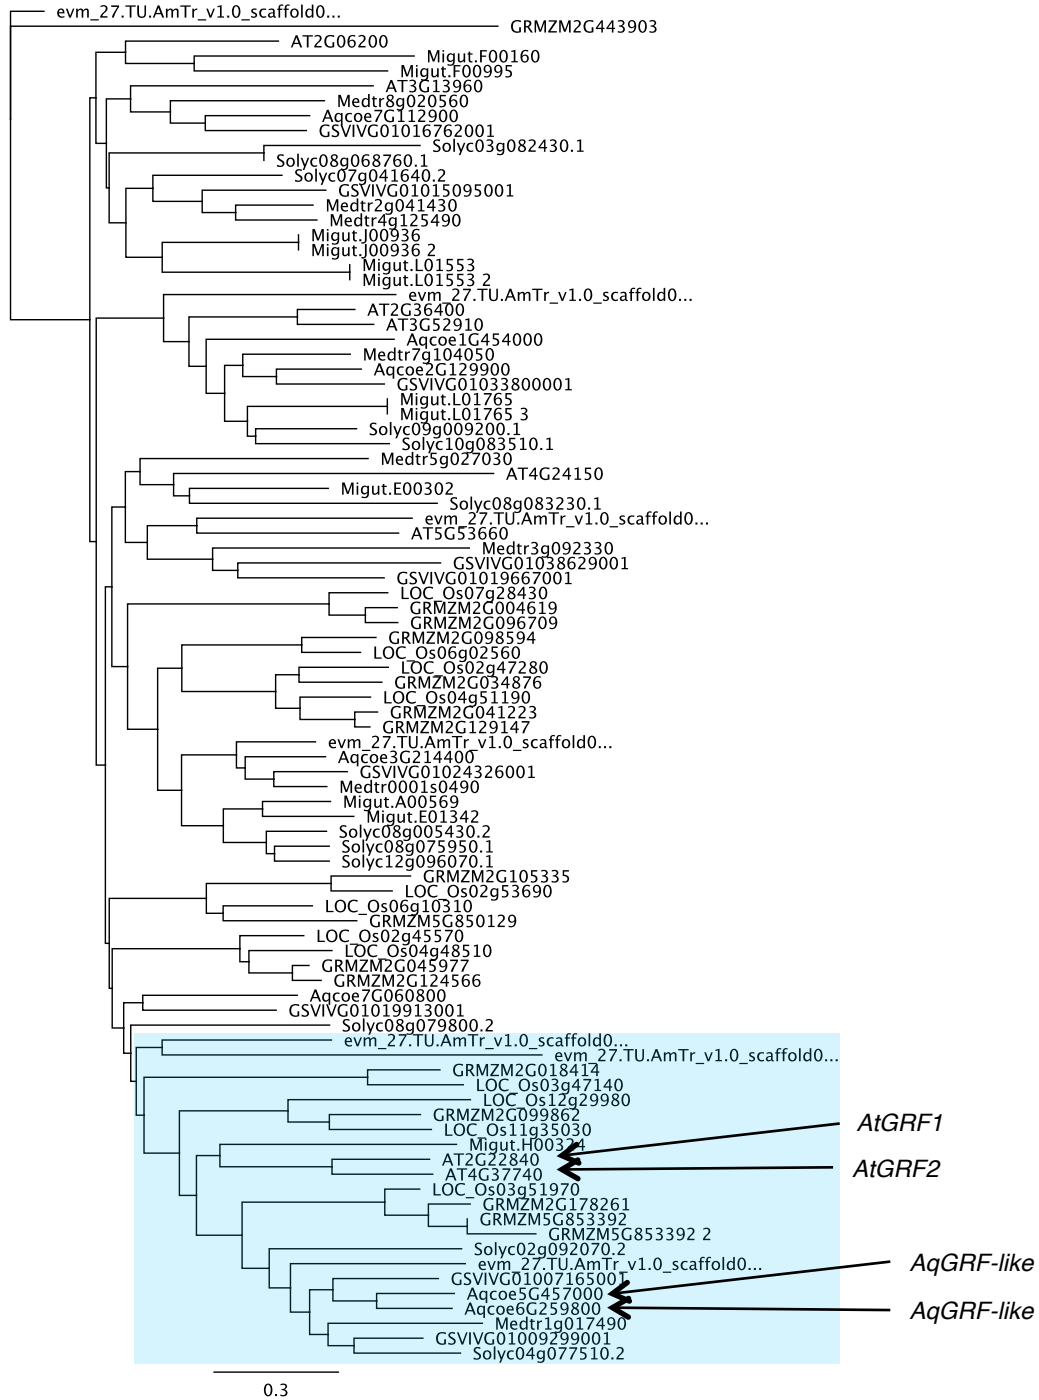

**BIG BROTHER GENES**

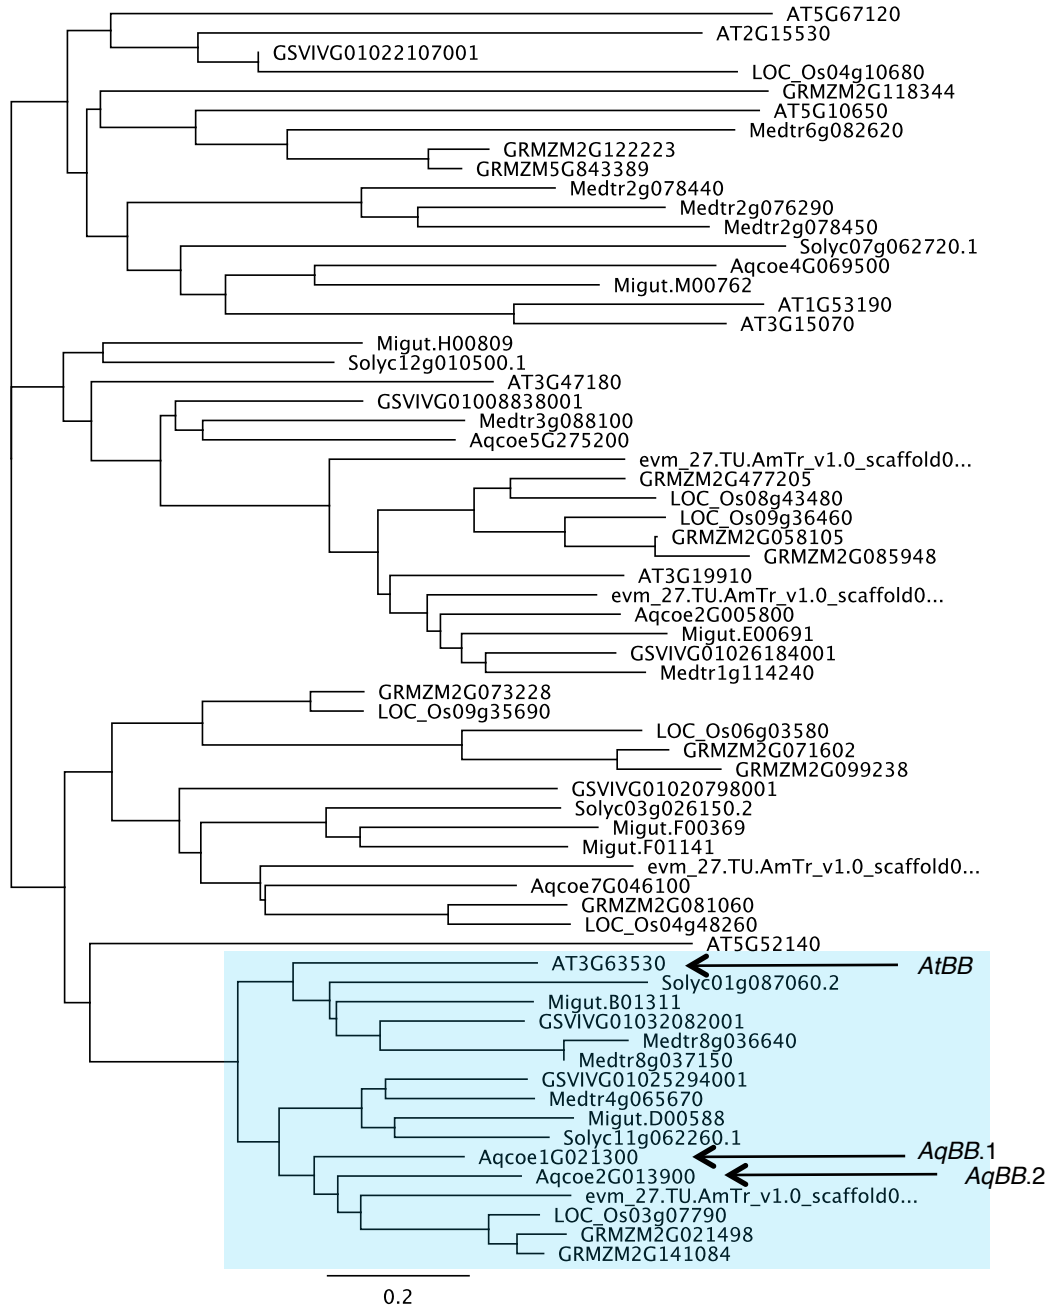

DA1 GENES

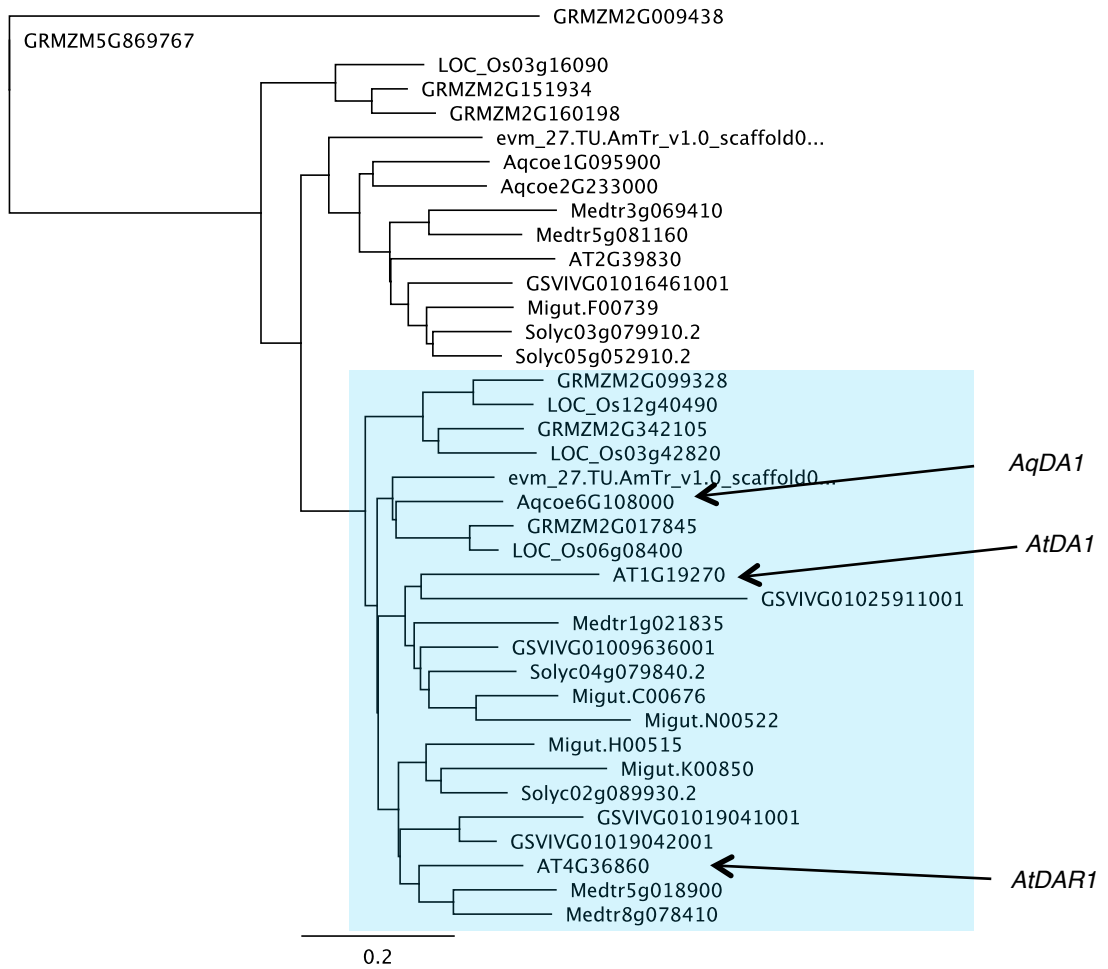

*KIP RELATED PROTEIN GENES*

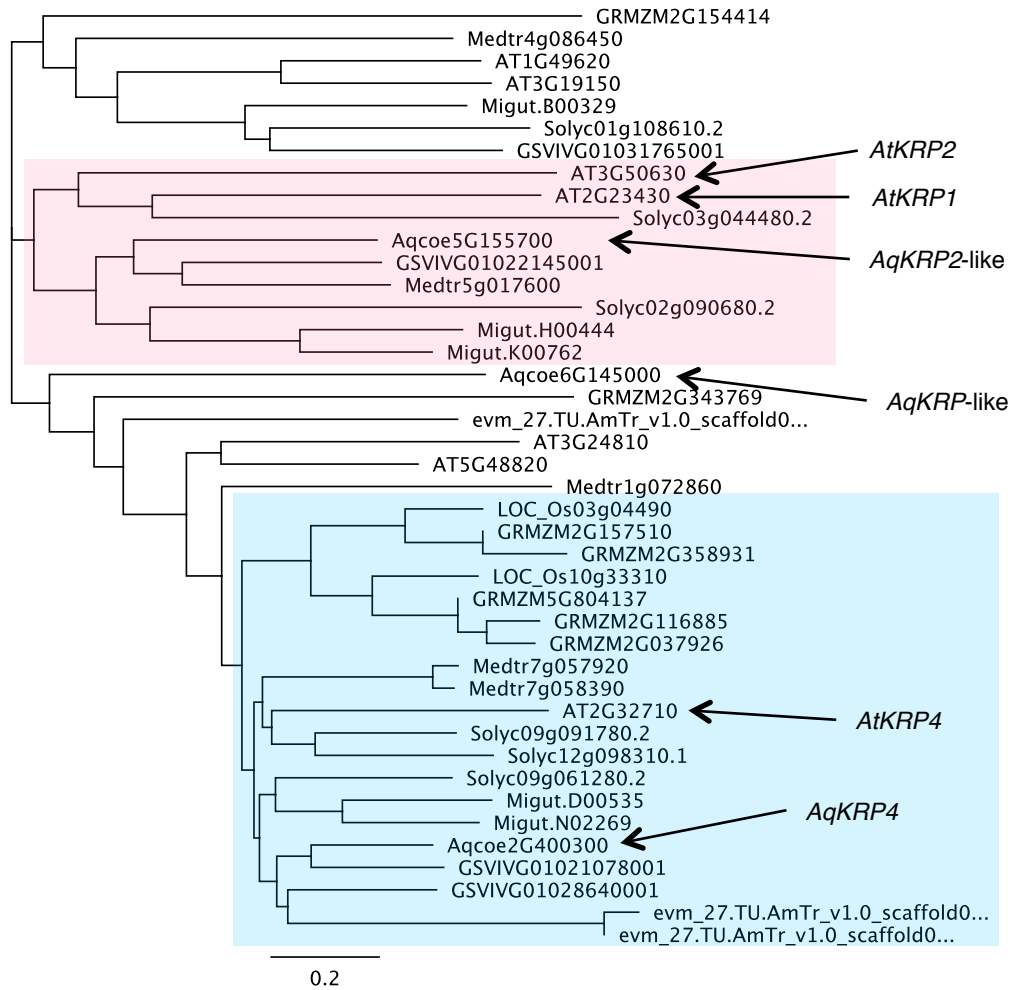

## STYLISH homologs

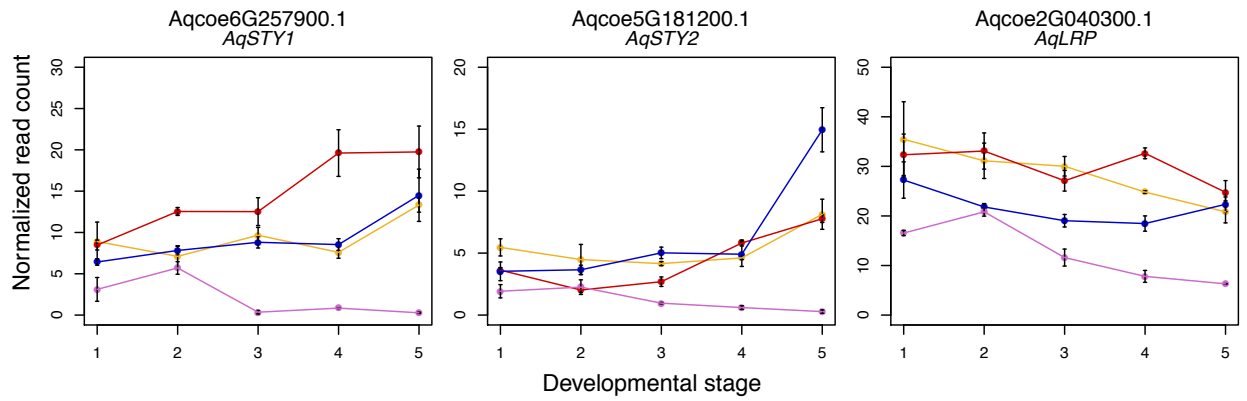

# Supplemental Figure 3

Genes up-regulated in blade and *A. ecalcarata*

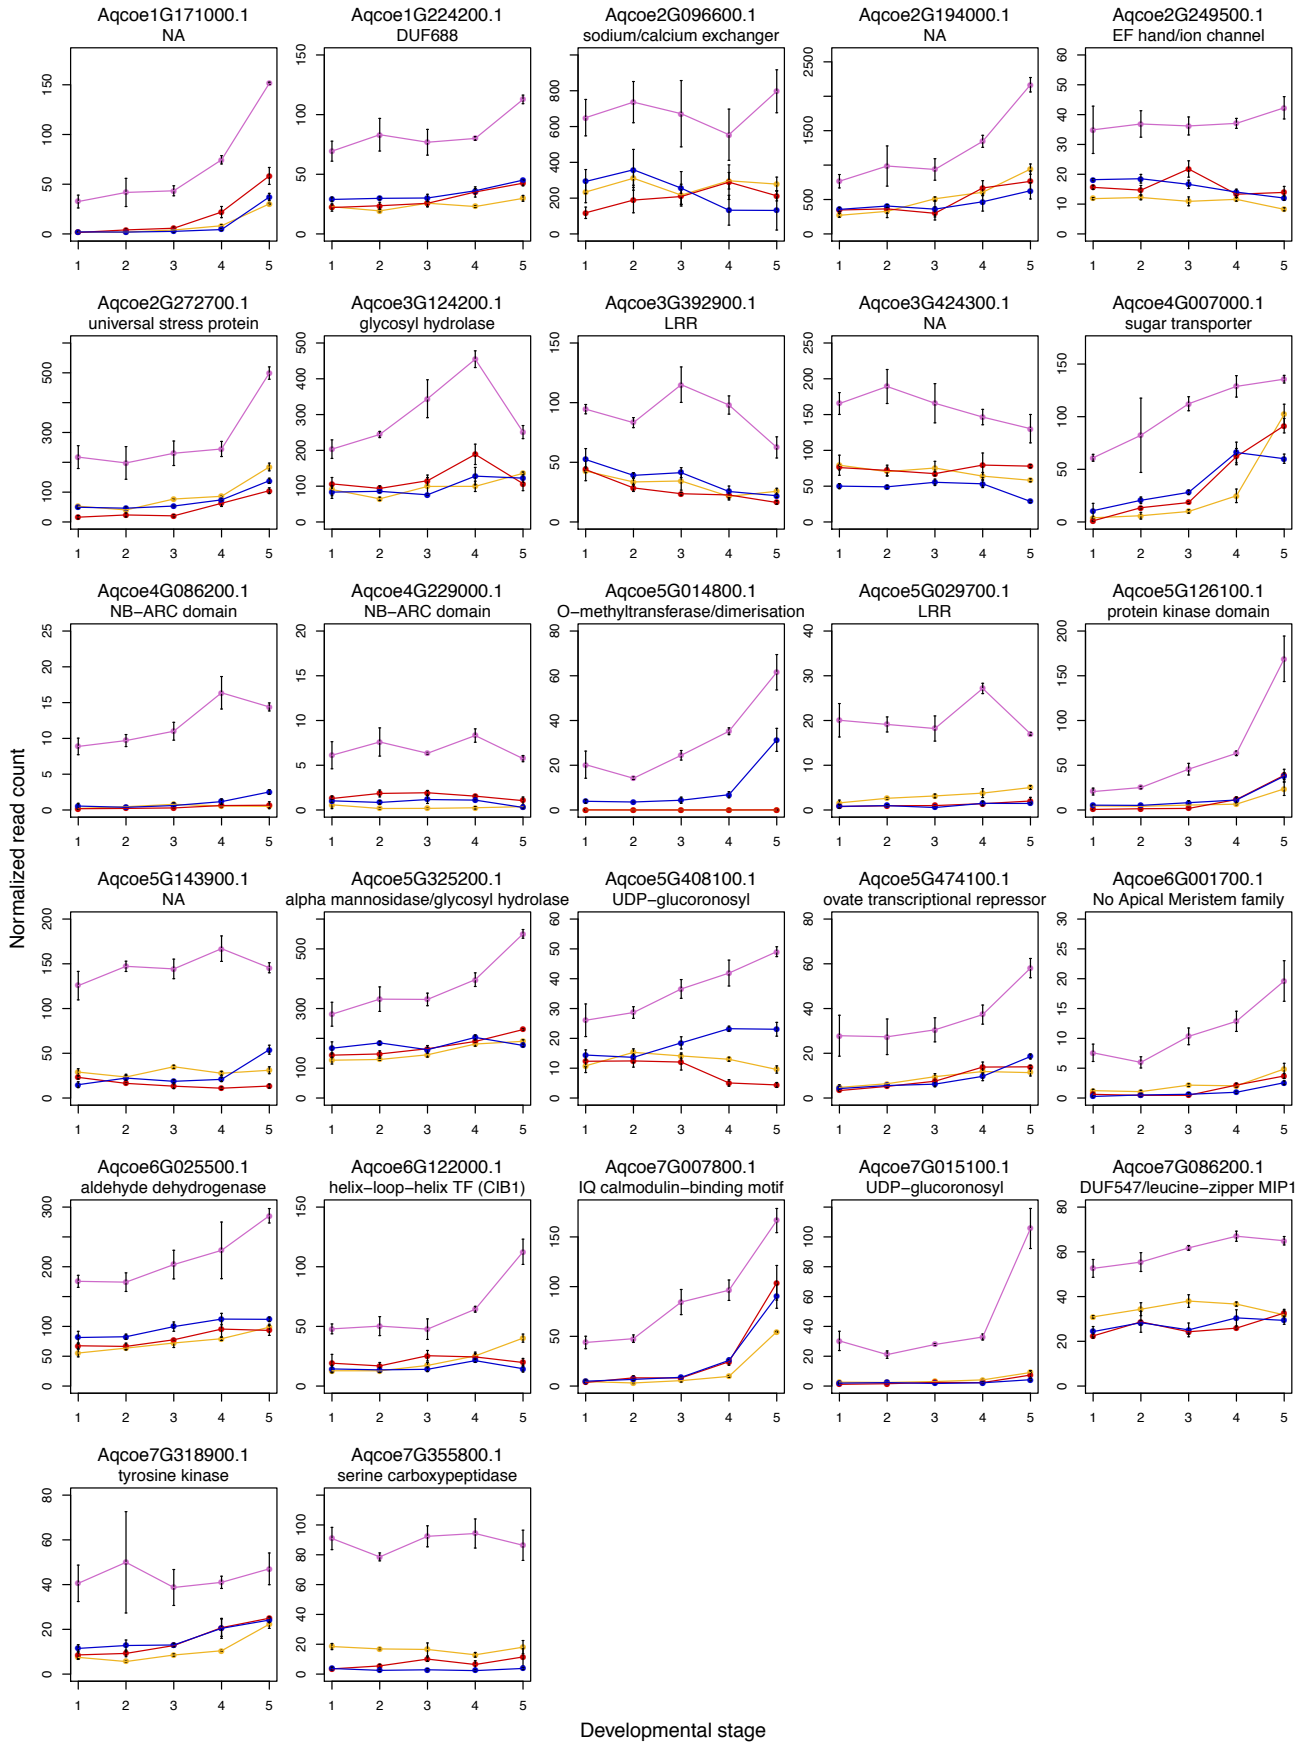



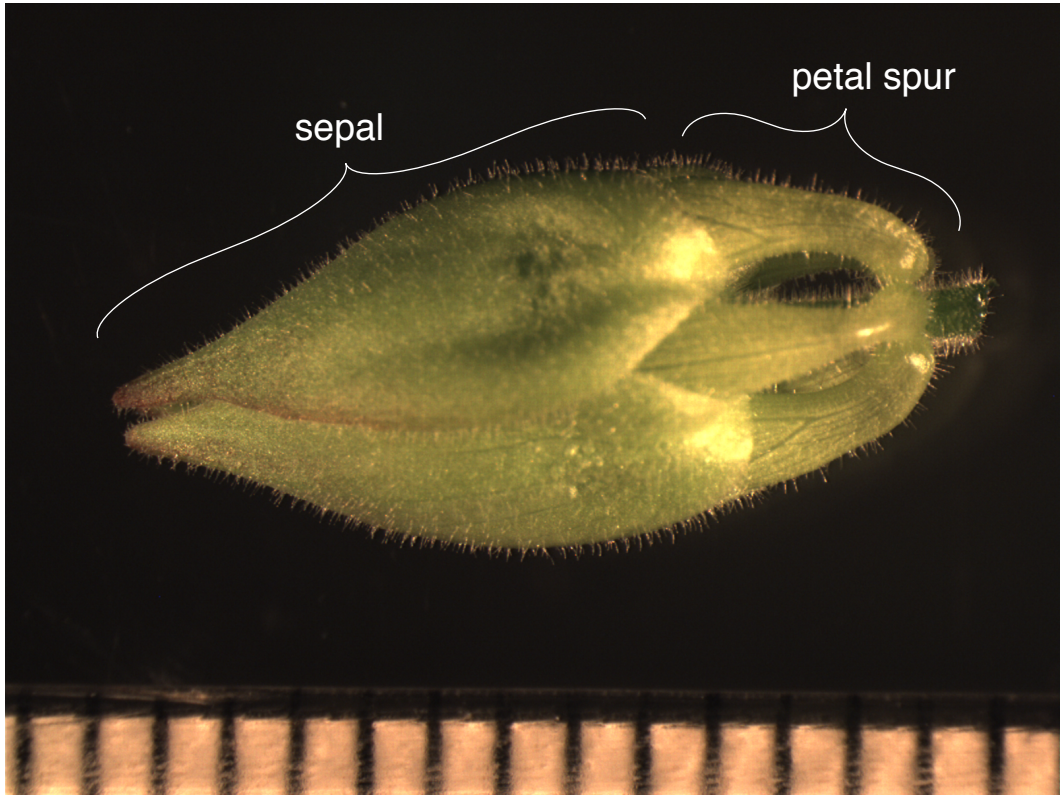

Image demonstrating how the nectar spur is exposed to light at later developmental stages
