# Supplementary material for: Comparative transcriptomics of early petal development across four diverse species of Aquilegia reveal few genes consistently associated with nectar spur development
Source: PubMed Central journal article supplement (PMC6704642; doi:10.1186/s12864-019-6002-9), 2019-08-22
Supplement: 12864_2019_6002_MOESM2_ESM.pdf [file 12864_2019_6002_MOESM2_ESM.pdf]

**Supp. Table 1. Sample Accession and Read Counts**

| Species              | Developmental Stage | Sample Name  | SRA Accession | Reads    |
|----------------------|---------------------|--------------|---------------|----------|
| <i>A. ecalcarata</i> | 1                   | E1.1         | SAMN10767326  | 8598859  |
|                      |                     | E1.2         | SAMN10767327  | 13695171 |
|                      |                     | E11.05       | SAMN10767328  | 27731596 |
|                      | 2                   | E2.2         | SAMN10767329  | 21904948 |
|                      |                     | E2.4         | SAMN10767330  | 18484940 |
|                      |                     | E2.1         | SAMN10767331  | 13954378 |
|                      | 3                   | E3.2         | SAMN10767332  | 9867680  |
|                      |                     | E3.1         | SAMN10767333  | 13914482 |
|                      |                     | E3.4         | SAMN10767334  | 15249358 |
|                      | 4                   | E4.1         | SAMN10767335  | 11318457 |
|                      |                     | E4.4         | SAMN10767336  | 19966385 |
|                      |                     | E4.2         | SAMN10767337  | 27802795 |
|                      | 5                   | E5.1         | SAMN10767338  | 18968148 |
|                      |                     | E5.2         | SAMN10767339  | 27307407 |
|                      |                     | E5.4         | SAMN10767340  | 19275310 |
| <i>A. sibirica</i>   | 1                   | S1.1         | SAMN10767341  | 15835638 |
|                      |                     | S1.3         | SAMN10767342  | 19520477 |
|                      |                     | S1.4         | SAMN10767343  | 17638008 |
|                      | 2                   | S2.1         | SAMN10767344  | 29073489 |
|                      |                     | S2.2         | SAMN10767345  | 13787797 |
|                      |                     | S2.3         | SAMN10767346  | 27276138 |
|                      | 3                   | S3.1         | SAMN10767347  | 28243206 |
|                      |                     | S3.2         | SAMN10767348  | 16190719 |
|                      |                     | S3.3         | SAMN10767349  | 13507606 |
|                      | 4                   | S4.2         | SAMN10767350  | 24070070 |
|                      |                     | S4.3         | SAMN10767351  | 26132376 |
|                      |                     | S4.4         | SAMN10767352  | 11672852 |
|                      | 5                   | S5.1         | SAMN10767353  | 23336879 |
|                      |                     | S5.2         | SAMN10767354  | 73675476 |
|                      |                     | S5.3         | SAMN10767355  | 16278285 |
| <i>A. formosa</i>    | 1                   | F1.2         | SAMN10767356  | 28166793 |
|                      |                     | F1.3         | SAMN10767357  | 14745020 |
|                      |                     | F1.4         | SAMN10767358  | 17853569 |
|                      | 2                   | F2.1         | SAMN10767359  | 22510106 |
|                      |                     | F2.3         | SAMN10767360  | 14564974 |
|                      |                     | F2.4         | SAMN10767361  | 32735055 |
|                      | 3                   | F3.4         | SAMN10767362  | 18213810 |
|                      |                     | F6.02        | SAMN10767363  | 29008498 |
|                      |                     | F6.03        | SAMN10767364  | 28437542 |
|                      | 4                   | F4.2         | SAMN10767365  | 26629630 |
| F4.3                 |                     | SAMN10767366 | 22336223      |          |

| Species              | Developmental Stage | Sample Name | SRA Accession | Reads    |
|----------------------|---------------------|-------------|---------------|----------|
|                      | 5                   | F4.4        | SAMN10767367  | 11466805 |
|                      |                     | F5.1        | SAMN10767368  | 11779719 |
|                      |                     | F5.2        | SAMN10767369  | 11895596 |
|                      |                     | F5.3        | SAMN10767370  | 15659147 |
| <i>A. chrysantha</i> | 1                   | C1.1        | SAMN10767371  | 21689516 |
|                      |                     | C1.2        | SAMN10767372  | 14249331 |
|                      |                     | C1.4        | SAMN10767373  | 27928554 |
|                      | 2                   | C2.1        | SAMN10767374  | 25960239 |
|                      |                     | C2.3        | SAMN10767375  | 14099220 |
|                      |                     | C2.4        | SAMN10767376  | 15568431 |
|                      | 3                   | C3.2        | SAMN10767377  | 32961220 |
|                      |                     | C3.3        | SAMN10767378  | 16849173 |
|                      |                     | C3.4        | SAMN10767379  | 16503316 |
|                      | 4                   | C4.1        | SAMN10767380  | 11277825 |
|                      |                     | C4.3        | SAMN10767381  | 18337656 |
|                      |                     | C4.4        | SAMN10767382  | 13846669 |
|                      | 5                   | C5.2        | SAMN10767383  | 25341020 |
|                      |                     | C5.3        | SAMN10767384  | 30708975 |
|                      |                     | C5.4        | SAMN10767385  | 11143963 |

**Supp. Table 2. Genes DE between developmental stages**

| Species              | DS1 to DS2 |      | DS2 to DS3 |      | DS3 to DS4 |      | DS4 to DS5 |      |
|----------------------|------------|------|------------|------|------------|------|------------|------|
|                      | up         | down | up         | down | up         | down | up         | down |
| <i>A. ecalcarata</i> | 14         | 3    | 87         | 107  | 48         | 42   | 3406       | 3115 |
| <i>A. sibirica</i>   | 0          | 0    | 45         | 12   | 181        | 110  | 2443       | 1524 |
| <i>A. formosa</i>    | 83         | 103  | 123        | 61   | 1673       | 790  | 459        | 190  |
| <i>A. chrysantha</i> | 13         | 2    | 87         | 36   | 28         | 11   | 2356       | 1201 |

**Supp. Table 3. GO enrichment of genes DE through dev, spurred taxa only**

| Expression through development | GO category | term                                   | ontology                           | BH adj p-value |
|--------------------------------|-------------|----------------------------------------|------------------------------------|----------------|
| up                             | GO:0015979  | photosynthesis                         | BP                                 | 5.98E-19       |
|                                | GO:0009765  | photosynthesis, light harvesting       | BP                                 | 2.84E-15       |
|                                | GO:0009523  | photosystem II                         | CC                                 | 9.26E-12       |
|                                | GO:0009654  | photosystem II oxygen evolving complex | CC                                 | 8.19E-09       |
|                                | GO:0009522  | photosystem I                          | CC                                 | 9.51E-07       |
|                                | GO:0019898  | extrinsic component of membrane        | CC                                 | 2.03E-06       |
|                                | GO:0009538  | photosystem I reaction center          | CC                                 | 3.84E-06       |
|                                | GO:0016020  | membrane                               | CC                                 | 6.66E-05       |
|                                | GO:0016491  | oxidoreductase activity                | MF                                 | 0.00022        |
|                                | GO:0005509  | calcium ion binding                    | MF                                 | 0.00095        |
|                                | GO:0055114  | oxidation-reduction process            | BP                                 | 0.00489        |
|                                | GO:0019684  | photosynthesis, light reaction         | BP                                 | 0.006569       |
|                                | GO:0042651  | thylakoid membrane                     | CC                                 | 0.009459       |
|                                | GO:0050661  | NADP binding                           | MF                                 | 0.022969       |
|                                | GO:0018580  | nitronate monooxygenase activity       | MF                                 | 0.031449       |
|                                | down        | GO:0003735                             | structural constituent of ribosome | MF             |
| GO:0006412                     |             | translation                            | BP                                 | 9.06E-11       |
| GO:0005840                     |             | ribosome                               | CC                                 | 9.58E-11       |
| GO:0005622                     |             | intracellular                          | CC                                 | 3.57E-09       |
| GO:0003676                     |             | nucleic acid binding                   | MF                                 | 6.32E-05       |

**Supp. Table 4. Genes commonly up/down regulated in one species relative to the other three**

| Dev              | <i>A. ecalcarata</i> |      | <i>A. sibirica</i> |      | <i>A. formosa</i> |      | <i>A. chrysantha</i> |      |
|------------------|----------------------|------|--------------------|------|-------------------|------|----------------------|------|
|                  | up                   | down | up                 | down | up                | down | up                   | down |
| <b>1</b>         | 989                  | 455  | 675                | 470  | 414               | 254  | 621                  | 319  |
| <b>2</b>         | 1341                 | 643  | 1129               | 723  | 662               | 385  | 786                  | 587  |
| <b>3</b>         | 1330                 | 803  | 908                | 615  | 814               | 473  | 886                  | 577  |
| <b>4</b>         | 1377                 | 1023 | 1175               | 753  | 925               | 381  | 1181                 | 924  |
| <b>5</b>         | 1778                 | 1376 | 969                | 686  | 603               | 283  | 1087                 | 728  |
| <b>intersect</b> | 453                  | 237  | 346                | 209  | 169               | 58   | 288                  | 149  |

**Supp. Table 5. Module GO Enrichment**

| Module | GO category | term                                                                                                        | ontology | BH adj p-value |
|--------|-------------|-------------------------------------------------------------------------------------------------------------|----------|----------------|
| MD1    | GO:0004601  | peroxidase activity                                                                                         | MF       | 0.03812        |
| MD3    | GO:0006412  | translation                                                                                                 | BP       | 6.35E-52       |
|        | GO:0003735  | structural constituent of ribosome                                                                          | MF       | 1.39E-48       |
|        | GO:0005840  | ribosome                                                                                                    | CC       | 1.81E-46       |
|        | GO:0005622  | intracellular                                                                                               | CC       | 1.18E-25       |
|        | GO:0015934  | large ribosomal subunit                                                                                     | CC       | 0.00011        |
|        | GO:0008033  | tRNA processing                                                                                             | BP       | 0.01166        |
|        | GO:0003676  | nucleic acid binding                                                                                        | MF       | 0.02947        |
|        | GO:0042254  | ribosome biogenesis                                                                                         | BP       | 0.03824        |
|        | GO:0003723  | RNA binding                                                                                                 | MF       | 0.04363        |
| MD4    | GO:0003676  | nucleic acid binding                                                                                        | MF       | 1.59E-13       |
|        | GO:0006260  | DNA replication                                                                                             | BP       | 3.87E-12       |
|        | GO:0003677  | DNA binding                                                                                                 | MF       | 2.36E-11       |
|        | GO:0005634  | nucleus                                                                                                     | CC       | 1.36E-08       |
|        | GO:0008017  | microtubule binding                                                                                         | MF       | 1.17E-06       |
|        | GO:0005871  | kinesin complex                                                                                             | CC       | 3.72E-06       |
|        | GO:0003777  | microtubule motor activity                                                                                  | MF       | 6.43E-06       |
|        | GO:0007018  | microtubule-based movement                                                                                  | BP       | 6.43E-06       |
|        | GO:0003735  | structural constituent of ribosome                                                                          | MF       | 0.00436        |
|        | GO:0005622  | intracellular                                                                                               | CC       | 0.00685        |
|        | GO:0005840  | ribosome                                                                                                    | CC       | 0.00685        |
|        | GO:0006412  | translation                                                                                                 | BP       | 0.00767        |
|        | GO:0006364  | rRNA processing                                                                                             | BP       | 0.014357       |
|        | GO:0016592  | mediator complex                                                                                            | CC       | 0.03782        |
| MD6    | GO:0000723  | telomere maintenance                                                                                        | BP       | 0.00048        |
|        | GO:0003678  | DNA helicase activity                                                                                       | MF       | 0.00056        |
|        | GO:0006281  | DNA repair                                                                                                  | BP       | 0.00318        |
| MD7    | GO:0004857  | enzyme inhibitor activity                                                                                   | MF       | 1.40E-07       |
|        | GO:0005618  | cell wall                                                                                                   | CC       | 1.40E-06       |
|        | GO:0030599  | pectinesterase activity                                                                                     | MF       | 1.40E-06       |
|        | GO:0042545  | cell wall modification                                                                                      | BP       | 1.40E-06       |
|        | GO:0030570  | pectate lyase activity                                                                                      | MF       | 0.01549        |
| MD8    | GO:0006281  | DNA repair                                                                                                  | BP       | 0.00095        |
|        | GO:0000723  | telomere maintenance                                                                                        | BP       | 0.01078        |
|        | GO:0003678  | DNA helicase activity                                                                                       | MF       | 0.01427        |
| MD10   | GO:0019684  | photosynthesis, light reaction                                                                              | BP       | 8.545E-09      |
|        | GO:0009539  | photosystem II reaction center                                                                              | CC       | 3.00E-06       |
|        | GO:0015979  | photosynthesis                                                                                              | BP       | 1.11E-05       |
|        | GO:0009579  | thylakoid                                                                                                   | CC       | 0.00017        |
|        | GO:0009772  | photosynthetic electron transport in photosystem II                                                         | BP       | 0.00017        |
|        | GO:0045156  | electron transporter, transferring electrons within the cyclic electron transport pathway of photosynthesis | MF       | 0.00017        |
|        | GO:0003676  | nucleic acid binding                                                                                        | MF       | 0.02947        |

| Module | GO category | term                                                                                         | ontology | BH adj p-value |
|--------|-------------|----------------------------------------------------------------------------------------------|----------|----------------|
|        | GO:0009507  | chloroplast                                                                                  | CC       | 0.00017        |
|        | GO:0017004  | cytochrome complex assembly                                                                  | BP       | 0.00017        |
|        | GO:0009521  | photosystem                                                                                  | CC       | 0.00169        |
|        | GO:0009767  | photosynthetic electron transport chain                                                      | BP       | 0.00169        |
|        | GO:0016168  | chlorophyll binding                                                                          | MF       | 0.00169        |
|        | GO:0015232  | heme transporter activity                                                                    | MF       | 0.00298        |
|        | GO:0015886  | heme transport                                                                               | BP       | 0.00298        |
|        | GO:0009523  | photosystem II                                                                               | CC       | 0.00736        |
|        | GO:0008137  | NADH dehydrogenase (ubiquinone) activity                                                     | MF       | 0.01402        |
|        | GO:0009522  | photosystem I                                                                                | CC       | 0.01543        |
| MD11   | GO:0006412  | translation                                                                                  | BP       | 1.67E-13       |
|        | GO:0003735  | structural constituent of ribosome                                                           | MF       | 5.28E-13       |
|        | GO:0005840  | ribosome                                                                                     | CC       | 5.28E-13       |
|        | GO:0005622  | intracellular                                                                                | CC       | 1.19E-09       |
|        | GO:0004298  | threonine-type endopeptidase activity                                                        | MF       | 1.45E-06       |
|        | GO:0005839  | proteasome core complex                                                                      | CC       | 1.45E-06       |
|        | GO:0051603  | proteolysis involved in cellular protein catabolic process                                   | BP       | 1.45E-06       |
|        | GO:0000786  | process                                                                                      | CC       | 1.73E-06       |
|        | GO:0004175  | nucleosome                                                                                   | MF       | 0.00259        |
|        | GO:0019773  | endopeptidase activity                                                                       | CC       | 0.00259        |
|        | GO:0006511  | proteasome core complex, alpha-subunit complex ubiquitin-dependent protein catabolic process | BP       | 0.00367        |
| MD18   | GO:0018580  | nitronate monooxygenase activity                                                             | MF       | 0.00400        |
|        | GO:0008171  | O-methyltransferase activity                                                                 | MF       | 0.02604        |
| MD19   | GO:0004097  | catechol oxidase activity                                                                    | MF       | 0.00468        |
| MD20   | GO:0015979  | photosynthesis                                                                               | BP       | 3.23E-21       |
|        | GO:0009765  | photosynthesis, light harvesting                                                             | BP       | 2.64E-10       |
|        | GO:0009523  | photosystem II                                                                               | CC       | 5.61E-10       |
|        | GO:0009654  | photosystem II oxygen evolving complex                                                       | CC       | 1.25E-08       |
|        | GO:0019898  | extrinsic component of membrane                                                              | CC       | 1.19E-07       |
|        | GO:0009522  | photosystem I                                                                                | CC       | 3.10E-07       |
|        | GO:0009538  | photosystem I reaction center                                                                | CC       | 1.59E-06       |
|        | GO:0003735  | structural constituent of ribosome                                                           | MF       | 1.14E-05       |
|        | GO:0006412  | translation                                                                                  | BP       | 1.77E-05       |
|        | GO:0005840  | ribosome                                                                                     | CC       | 1.77E-05       |
|        | GO:0005509  | calcium ion binding                                                                          | MF       | 0.00146        |
|        | GO:0006457  | protein folding                                                                              | BP       | 0.00257        |
|        | GO:0042651  | thylakoid membrane                                                                           | CC       | 0.00620        |
|        | GO:0015995  | chlorophyll biosynthetic process                                                             | BP       | 0.01786        |
|        | GO:0016851  | magnesium chelatase activity                                                                 | MF       | 0.03022        |
| MD21   | GO:0055114  | oxidation-reduction process                                                                  | BP       | 1.52E-07       |
|        | GO:0016491  | oxidoreductase activity                                                                      | MF       | 9.83E-06       |
|        | GO:0016747  | transferase activity, transferring acyl groups other than amino-acyl groups                  | MF       | 0.00500        |
|        | GO:0016758  | transferase activity, transferring hexosyl groups                                            | MF       | 0.00857        |
|        | GO:0008152  | metabolic process                                                                            | BP       | 0.01933        |
|        | GO:0006633  | fatty acid biosynthetic process                                                              | BP       | 0.02692        |

| Module | GO category                                                                                        | term                                                                                                                                                                                                                                                            | ontology                                   | BH adj p-value                                                                |
|--------|----------------------------------------------------------------------------------------------------|-----------------------------------------------------------------------------------------------------------------------------------------------------------------------------------------------------------------------------------------------------------------|--------------------------------------------|-------------------------------------------------------------------------------|
| MD22   | GO:0009733<br>GO:0005975                                                                           | response to auxin<br>carbohydrate metabolic process                                                                                                                                                                                                             | BP<br>BP                                   | 0.00796<br>0.02778                                                            |
| MD23   | GO:0055114<br>GO:0016705<br><br>GO:0030117<br>GO:0006886<br>GO:0005506<br>GO:0005198<br>GO:0020037 | oxidation-reduction process<br>oxidoreductase activity, acting on paired donors,<br>with incorporation or reduction of molecular oxygen<br>membrane coat<br>intracellular protein transport<br>iron ion binding<br>structural molecule activity<br>heme binding | BP<br>MF<br><br>CC<br>BP<br>MF<br>MF<br>MF | 0.00925<br>0.00925<br><br>0.01680<br>0.01873<br>0.02296<br>0.02296<br>0.02296 |
| MD25   | GO:0003700                                                                                         | transcription factor activity, sequence-specific DNA binding                                                                                                                                                                                                    | MF                                         | 0.00049                                                                       |

**Supp. Table 6. Developmentally DE genes by module**

| Module | Genes per module | Up-regulated from DS1 to DS5 |           |             | Down-regulated from DS1 to DS5 |           |             |
|--------|------------------|------------------------------|-----------|-------------|--------------------------------|-----------|-------------|
|        |                  | DE genes                     | % of DE   | % of module | DE genes                       | % of DE   | % of module |
| MD1    | 124              | 3                            | < 1       | 2.4         | 0                              | 0         | 0           |
| MD2    | 66               | 0                            | 0         | 0           | 0                              | 0         | 0           |
| MD3    | 1027             | 19                           | 1.5       | 1.9         | <b>185</b>                     | <b>17</b> | <b>18</b>   |
| MD4    | 2619             | 98                           | 7.8       | 3.7         | <b>547</b>                     | <b>50</b> | <b>21</b>   |
| MD5    | 855              | 1                            | < 1       | < 1         | 2                              | < 1       | < 1         |
| MD6    | 1296             | 6                            | < 1       | < 1         | 5                              | < 1       | < 1         |
| MD7    | 166              | 0                            | 0         | 0           | 0                              | 0         | 0           |
| MD8    | 1956             | 4                            | < 1       | < 1         | 14                             | 1.3       | < 1         |
| MD9    | 308              | 0                            | 0         | 0           | 0                              | 0         | 0           |
| MD10   | 643              | 0                            | 0         | 0           | 1                              | < 1       | < 1         |
| MD11   | 748              | 5                            | < 1       | < 1         | <b>174</b>                     | <b>16</b> | <b>23</b>   |
| MD12   | 352              | 1                            | < 1       | < 1         | 7                              | < 1       | 2           |
| MD13   | 267              | 0                            | 0         | 0           | 0                              | 0         | 0           |
| MD14   | 59               | 0                            | 0         | 0           | 0                              | 0         | 0           |
| MD15   | 2984             | 22                           | 1.7       | < 1         | 16                             | 1.5       | < 1         |
| MD16   | 154              | 6                            | < 1       | 3.9         | 0                              | 0         | 0           |
| MD17   | 57               | 9                            | < 1       | 16          | 0                              | 0         | 0           |
| MD18   | 101              | 11                           | < 1       | 11          | 0                              | 0         | 0           |
| MD19   | 50               | 0                            | 0         | 0           | 0                              | 0         | 0           |
| MD20   | 274              | 11                           | < 1       | 4           | 0                              | 0         | 0           |
| MD21   | 825              | <b>160</b>                   | <b>13</b> | <b>19</b>   | 2                              | < 1       | < 1         |
| MD22   | 2468             | <b>626</b>                   | <b>50</b> | <b>25</b>   | 99                             | 9         | 4           |
| MD23   | 1241             | <b>274</b>                   | <b>22</b> | <b>22</b>   | 33                             | 3         | 2.7         |
| MD24   | 46               | 0                            | 0         | 0           | 0                              | 0         | 0           |
| MD25   | 64               | 0                            | 0         | 0           | 0                              | 0         | 0           |
| MD26   | 2172             | 6                            | < 1       | < 1         | 9                              | < 1       | < 1         |
| MD27   | 53               | 0                            | 0         | 0           | 0                              | 0         | 0           |
| NA     | 815              | 0                            | 0         | 0           | 0                              | 0         | 0           |

**Supp. Table 7. Spurred taxa vs *A. ecalcarata* DE genes by module**

| Module      | Genes per module | Up-regulated in spurred taxa |           |             | Up-regulated in <i>A. ecalcarata</i> |           |             |
|-------------|------------------|------------------------------|-----------|-------------|--------------------------------------|-----------|-------------|
|             |                  | DE genes                     | % of DE   | % of module | DE genes                             | % of DE   | % of module |
| MD1         | 124              | 0                            | 0         | 0           | 0                                    | 0         | 0           |
| MD2         | 66               | 0                            | 0         | 0           | 0                                    | 0         | 0           |
| MD3         | 1027             | 1                            | < 1       | < 1         | 0                                    | 0         | 0           |
| MD4         | 2619             | 28                           | 12        | 1.1         | 5                                    | 1.1       | < 1         |
| MD5         | 855              | 9                            | 3.8       | 1.1         | 0                                    | 0         | 0           |
| MD6         | 1296             | 7                            | 3         | < 1         | 0                                    | 0         | 0           |
| MD7         | 166              | 0                            | 0         | 0           | 0                                    | 0         | 0           |
| MD8         | 1956             | 24                           | 10        | 1.2         | 0                                    | 0         | 0           |
| MD9         | 308              | 7                            | 3         | 2.3         | 2                                    | < 1       | < 1         |
| MD10        | 643              | 0                            | 0         | 0           | 3                                    | < 1       | < 1         |
| MD11        | 748              | 0                            | 0         | 0           | 0                                    | 0         | 0           |
| MD12        | 352              | 2                            | < 1       | < 1         | 0                                    | 0         | 0           |
| MD13        | 267              | 0                            | 0         | 0           | 5                                    | 1.1       | 1.9         |
| MD14        | 59               | 0                            | 0         | 0           | 2                                    | < 1       | 3.4         |
| <b>MD15</b> | <b>2984</b>      | <b>135</b>                   | <b>57</b> | <b>4.5</b>  | <b>404</b>                           | <b>89</b> | <b>14</b>   |
| MD16        | 154              | 0                            | 0         | 0           | 0                                    | 0         | 0           |
| MD17        | 57               | 1                            | < 1       | 1.8         | 0                                    | 0         | 0           |
| MD18        | 101              | 0                            | 0         | 0           | 0                                    | 0         | 0           |
| MD19        | 50               | 0                            | 0         | 0           | 0                                    | 0         | 0           |
| MD20        | 274              | 0                            | 0         | 0           | 0                                    | 0         | 0           |
| MD21        | 825              | 3                            | 1.3       | < 1         | 0                                    | 0         | 0           |
| MD22        | 2468             | 0                            | 0         | 0           | 32                                   | 7.1       | 1.3         |
| MD23        | 1241             | 4                            | 1.7       | < 1         | 0                                    | 0         | 0           |
| MD24        | 46               | 1                            | < 1       | 2.2         | 0                                    | 0         | 0           |
| MD25        | 64               | 0                            | 0         | 0           | 0                                    | 0         | 0           |
| MD26        | 2172             | 15                           | 6.3       | < 1         | 0                                    | 0         | 0           |
| MD27        | 53               | 0                            | 0         | 0           | 0                                    | 0         | 0           |
| NA          | 815              | 0                            | 0         | 0           | 0                                    | 0         | 0           |



**Supp. Table 8. Genes DE uniquely in *A. sibirica* by module**

| Module      | Genes per module | Unique DE in <i>A. sibirica</i> |           |             |            |           |             |
|-------------|------------------|---------------------------------|-----------|-------------|------------|-----------|-------------|
|             |                  | up                              |           |             | down       |           |             |
|             |                  | n                               | % n       | % of module | n          | % of n    | % of module |
| MD1         | 124              | 11                              | < 1       | 8.9         | 8          | < 1       | 6.5         |
| MD2         | 66               | 4                               | < 1       | 6.1         | 3          | < 1       | 4.5         |
| MD3         | 1027             | 235                             | 8.8       | 23          | 99         | 4.6       | 9.6         |
| MD4         | 2619             | 108                             | 4         | 4.1         | 181        | 8.5       | 6.9         |
| MD5         | 855              | 34                              | 1.3       | 4           | 65         | 3         | 7.6         |
| MD6         | 1296             | 31                              | 1.2       | 2.4         | 91         | 4.3       | 7           |
| MD7         | 166              | 7                               | < 1       | 4.2         | 1          | < 1       | 0.6         |
| MD8         | 1956             | 44                              | 1.6       | 2.2         | 172        | 8.1       | 8.8         |
| MD9         | 308              | 28                              | 1         | 9.1         | 20         | < 1       | 6.5         |
| MD10        | 643              | 41                              | 1.5       | 6.4         | 42         | 2         | 6.5         |
| MD11        | 748              | 60                              | 2.2       | 8           | 60         | 2.8       | 8           |
| MD12        | 352              | 55                              | 2.1       | 16          | 49         | 2.3       | 14          |
| MD13        | 267              | 8                               | < 1       | 3           | 29         | 1.4       | 11          |
| MD14        | 59               | 0                               | 0         | 0           | 0          | 0         | 0           |
| MD15        | 2984             | 124                             | 4.6       | 4.2         | 269        | 13        | 9           |
| MD16        | 154              | 5                               | < 1       | 3.2         | 16         | < 1       | 10          |
| MD17        | 57               | 11                              | < 1       | 19          | 0          | 0         | 0           |
| MD18        | 101              | 0                               | 0         | 0           | 18         | < 1       | 18          |
| MD19        | 50               | 4                               | < 1       | 8           | 5          | < 1       | 10          |
| MD20        | 274              | 6                               | < 1       | 2.2         | 40         | 1.9       | 15          |
| MD21        | 825              | 24                              | < 1       | 2.9         | 111        | 5.2       | 13          |
| MD22        | 2468             | 103                             | 3.9       | 4.2         | 246        | 12        | 10          |
| MD23        | 1241             | 433                             | <b>16</b> | 35          | 107        | 5         | 8.6         |
| MD24        | 46               | 28                              | 1         | 61          | 3          | < 1       | 6.5         |
| MD25        | 64               | 32                              | 1.2       | 50          | 0          | 0         | 0           |
| <b>MD26</b> | <b>2172</b>      | <b>1160</b>                     | <b>43</b> | <b>53</b>   | <b>445</b> | <b>21</b> | <b>20</b>   |
| MD27        | 53               | 33                              | 1.2       | 62          | 4          | < 1       | 7.5         |
| NA          | 815              | 39                              | 1.5       | 4.8         | 50         | 2.3       | 6.1         |

**Supp. Table 9. Genes DE uniquely in *A. formosa* by module**

| Module     | Genes per module | Unique DE in <i>A. formosa</i> |           |             |            |           |             |
|------------|------------------|--------------------------------|-----------|-------------|------------|-----------|-------------|
|            |                  | up                             |           |             | down       |           |             |
|            |                  | n                              | % n       | % of module | n          | % of n    | % of module |
| MD1        | 124              | 11                             | < 1       | 8.9         | 6          | < 1       | 4.8         |
| MD2        | 66               | 4                              | < 1       | 6.1         | 3          | < 1       | 4.5         |
| MD3        | 1027             | 39                             | 1.7       | 3.8         | 35         | 2.1       | 3.4         |
| MD4        | 2619             | 352                            | 15        | 13          | 164        | 10        | 6.3         |
| MD5        | 855              | 149                            | 6.5       | 17          | 69         | 4.2       | 8.1         |
| <b>MD6</b> | <b>1296</b>      | <b>720</b>                     | <b>31</b> | <b>56</b>   | <b>178</b> | <b>11</b> | <b>14</b>   |
| MD7        | 166              | 19                             | < 1       | 11          | 4          | < 1       | 2.4         |
| MD8        | 1956             | 30                             | 1.3       | 1.5         | 73         | 4.5       | 3.7         |
| MD9        | 308              | 22                             | < 1       | 7.1         | 16         | < 1       | 5.2         |
| MD10       | 643              | 17                             | < 1       | 2.6         | 113        | 6.9       | 18          |
| MD11       | 748              | 36                             | 1.6       | 4.8         | 84         | 5.1       | 11          |
| MD12       | 352              | 33                             | 1.4       | 9.4         | 36         | 2.2       | 10          |
| MD13       | 267              | 6                              | < 1       | 2.2         | 69         | 4.2       | 26          |
| MD14       | 59               | 2                              | < 1       | 3.4         | 19         | 1.2       | 32          |
| MD15       | 2984             | 109                            | 4.7       | 3.7         | 185        | 11        | 6.2         |
| MD16       | 154              | 10                             | < 1       | 6.5         | 9          | < 1       | 5.8         |
| MD17       | 57               | 3                              | < 1       | 5.3         | 4          | < 1       | 7           |
| MD18       | 101              | 4                              | < 1       | 4           | 10         | < 1       | 9.9         |
| MD19       | 50               | 14                             | < 1       | 28          | 1          | < 1       | 2           |
| MD20       | 274              | 37                             | 1.6       | 14          | 32         | 2         | 12          |
| MD21       | 825              | 330                            | 14        | 40          | 39         | 2.4       | 4.7         |
| MD22       | 2468             | 198                            | 8.6       | 8           | 210        | 13        | 8.5         |
| MD23       | 1241             | 57                             | 2.5       | 4.6         | 73         | 4.5       | 5.9         |
| MD24       | 46               | 5                              | < 1       | 11          | 1          | < 1       | 2.2         |
| MD25       | 64               | 0                              | 0         | 0           | 19         | 1.2       | 30          |
| MD26       | 2172             | 56                             | 2.4       | 2.6         | 148        | 9.1       | 6.8         |
| MD27       | 53               | 1                              | < 1       | 1.9         | 0          | 0         | 0           |
| NA         | 815              | 38                             | 1.7       | 4.7         | 35         | 2.1       | 4.3         |

**Supp. Table 10. Genes DE uniquely in *A. chrysantha* by module**

| Module     | Genes per module | Unique DE in <i>A. chrysantha</i> |           |             |            |           |             |
|------------|------------------|-----------------------------------|-----------|-------------|------------|-----------|-------------|
|            |                  | up                                |           |             | down       |           |             |
|            |                  | n                                 | % of n    | % of module | n          | % of n    | % of module |
| MD1        | 124              | 8                                 | < 1       | 6.5         | 12         | < 1       | 9.7         |
| MD2        | 66               | 13                                | < 1       | 20          | 2          | < 1       | 3           |
| MD3        | 1027             | 71                                | 2.3       | 6.9         | 81         | 3.2       | 7.9         |
| MD4        | 2619             | 633                               | 21        | 24          | 214        | 8.5       | 8.2         |
| MD5        | 855              | 111                               | 3.6       | 13          | 52         | 2.1       | 6.1         |
| MD6        | 1296             | 29                                | < 1       | 2.2         | 93         | 3.7       | 7.2         |
| MD7        | 166              | 31                                | 1         | 19          | 8          | < 1       | 4.8         |
| <b>MD8</b> | <b>1956</b>      | <b>1154</b>                       | <b>38</b> | <b>59</b>   | <b>299</b> | <b>12</b> | <b>15</b>   |
| MD9        | 308              | 31                                | 1         | 10          | 37         | 1.5       | 12          |
| MD10       | 643              | 27                                | < 1       | 4.2         | 82         | 3.3       | 13          |
| MD11       | 748              | 71                                | 2.3       | 9.5         | 57         | 2.3       | 7.6         |
| MD12       | 352              | 29                                | < 1       | 8.2         | 25         | 1         | 7.1         |
| MD13       | 267              | 67                                | 2.2       | 25          | 27         | 1.1       | 10          |
| MD14       | 59               | 3                                 | < 1       | 5.1         | 4          | < 1       | 6.8         |
| MD15       | 2984             | 159                               | 5.2       | 5.3         | 233        | 9.3       | 7.8         |
| MD16       | 154              | 35                                | 1.1       | 23          | 3          | < 1       | 1.9         |
| MD17       | 57               | 17                                | < 1       | 30          | 5          | < 1       | 8.8         |
| MD18       | 101              | 74                                | 2.4       | 73          | 2          | < 1       | 2           |
| MD19       | 50               | 1                                 | < 1       | 2           | 6          | < 1       | 12          |
| MD20       | 274              | 28                                | < 1       | 10          | 77         | 3.1       | 28          |
| MD21       | 825              | 94                                | 3.1       | 11          | 62         | 2.5       | 7.5         |
| MD22       | 2468             | 170                               | 5.5       | 6.9         | 540        | 21        | 22          |
| MD23       | 1241             | 72                                | 2.3       | 5.8         | 307        | 12        | 25          |
| MD24       | 46               | 2                                 | < 1       | 4.3         | 0          | 0         | 0           |
| MD25       | 64               | 10                                | < 1       | 16          | 7          | < 1       | 11          |
| MD26       | 2172             | 84                                | 2.7       | 3.9         | 206        | 8.2       | 9.5         |
| MD27       | 53               | 2                                 | < 1       | 3.8         | 5          | < 1       | 9.4         |
| NA         | 815              | 48                                | 1.6       | 5.9         | 66         | 2.6       | 8.1         |

**Sup. Table 11. Developmentally DE genes in blade and spur cup tissue**

|          | 1mm  | VS | 3mm  |
|----------|------|----|------|
| blade    | 1111 |    | 1415 |
| spur cup | 660  |    | 1866 |

**Sup. Table 12. Tissue-specific DE genes at 1 mm and 3 mm stages**

|      | blade | VS | spur cup |
|------|-------|----|----------|
| 1 mm | 490   |    | 280      |
| 3 mm | 1178  |    | 767      |

**Sup. Table 13. Overlap of blade vs. cup DE with *A. ecalcarata* vs. spurred**

|      |               | blade                |              | spur cup             |              |
|------|---------------|----------------------|--------------|----------------------|--------------|
|      |               | <i>A. ecalcarata</i> | spurred taxa | <i>A. ecalcarata</i> | spurred taxa |
| 1 mm |               | 490                  |              | 280                  |              |
|      | intersect DS3 | 102                  | 21           | 21                   | 43           |
| 3 mm |               | 1178                 |              | 767                  |              |
|      | intersect DS4 | 163                  | 43           | 31                   | 108          |
